# Supplementary material for: Ramucirumab after prior sorafenib in patients with advanced hepatocellular carcinoma and elevated alpha-fetoprotein: Japanese subgroup analysis of the REACH-2 trial
Source: Springer Nature journal article supplement (doi:10.1007/s00535-020-01668-w), 2020-02-27
Supplement: MOESM1 [file 17748116]

**Title:** Ramucirumab after prior sorafenib in patients with advanced hepatocellular carcinoma and elevated alpha-fetoprotein: Japanese subgroup analysis of the REACH-2 trial

**Journal:** *Journal of Gastroenterology*

**Authors:** Masatoshi Kudo, Takuji Okusaka, Kenta Motomura, Izumi Ohno, Manabu Morimoto, Satoru Seo, Yoshiyuki Wada, Shinpei Sato, Tatsuya Yamashita, Masayuki Furukawa, Takeshi Aramaki, Seijin Nadano, Kazuyoshi Ohkawa, Hirofumi Fujii, Toshihiro Kudo, Junji Furuse, Hiroki Takai, Gosuke Homma, Reigetsu Yoshikawa, Andrew Zhu

**Corresponding author:** Masatoshi Kudo; Department of Gastroenterology and Hepatology, Kindai University Faculty of Medicine, 377-2 Ohno-Higashi, Osaka-Sayama, Osaka 589-8511, Japan; m-kudo@med.kinki.ac.jp

**Supplementary Table 1** Postdiscontinuation systemic therapies in the Japanese REACH-2 subpopulation

| <b>Systemic therapy</b>                | <b>Ramucirumab</b> | <b>Placebo</b>  |
|----------------------------------------|--------------------|-----------------|
| <b>n (%)</b>                           | <b>(n = 41)</b>    | <b>(n = 18)</b> |
| Overall                                | 10 (24)            | 6 (33)          |
| Chemotherapy                           | 4 (10)             | 2 (11)          |
| Cisplatin                              | 2 (5)              | 0               |
| Fluorouracil                           | 2 (5)              | 0               |
| Gimeracil w/oteracil potassium/tegafur | 3 (7)              | 1 (6)           |
| Tegafur/uracil                         | 1 (2)              | 1 (6)           |
| Immunotherapy/immunomodulatory agents  | 4 (10)             | 1 (6)           |
| Atezolizumab                           | 1 (2)              | 1 (6)           |
| Ipilimumab                             | 2 (5)              | 0               |
| Lirilumab                              | 1 (2)              | 0               |
| Mogamulizumab                          | 1 (2)              | 0               |
| Nivolumab                              | 3 (7)              | 0               |
| Pegylated interferon alpha-2A          | 1 (2)              | 0               |
| Targeted small molecule inhibitors     | 6 (15)             | 3 (17)          |
| Regorafenib                            | 4 (10)             | 2 (11)          |
| Sorafenib                              | 4 (10)             | 2 (11)          |
| Targeted antibody                      | 1 (2)              | 1 (6)           |
| Codrituzumab                           | 1 (2)              | 1 (6)           |
